# Supplementary material
Source: PubMed Central journal article supplement (PMC2714729)
Supplement: ddp249_1.pdf [file ddp249_1.pdf]

**Table 2.** Primers and temperature values for PCR amplification of *ACTG1* exons from genomic DNA and mutation screening by dHPLC

| Exon | Primer (5'>3')                                  | Annealing Temperature | dHPLC Melting Temperature |
|------|-------------------------------------------------|-----------------------|---------------------------|
| 1    | CAATGGGTGCCCGGCTT<br>CAACCGCCTGGAACCGAAG        | 58                    | 68                        |
| 2    | ACGCGCCCGCCTGAGTCCTCC<br>ACCGAACCCACCCCGCAAC    | 63                    | 64.6                      |
| 3    | GCGGGGTGGGTTTCGGTGTC<br>AGGAAATGCCGGGAGAGGAACAG | 60                    | 64.2                      |
| 4a   | CATGGGGTGGCCGTGGGTCT<br>GCTCGAAGTCCAGGGCGACGT   | 63                    | 64                        |
| 4b   | CCGGGCCTGACCGACTACC<br>GCCCTCCCTTAGTGATGCTGTGT  | 63                    | 62                        |
| 5    | GTTTCTACTTTACATCCTCGGTGA<br>CGGCACGGCTTCAGCTC   | 63                    | 62.2                      |
| 6    | GGGGGCGCTCTGTGAGCT<br>GCCAGGGGCAAATTTCTATTCTC   | 63                    | 63.6                      |
